# Supplementary material
Source: MDPI journal article supplement (https://www.mdpi.com/2071-1050/9/1/86)
Supplement: s1 [file s1]

## Sheet: Table S1
Table S1. Green manure land cost per N unit (ha kg-1 N)
	Seed rate	Land cost due to seed production*	Symbiotically fixed N**	Land cost due to seed production	Land cost due to lower rotation intensity	Total land cost per N unit
	kg ha-1	ha	kg ha-1	ha kg -1 N	ha	ha kg -1 N
Vetch in rainfed fruit orchards (olive, almond, etc.)	70	0.088	69.2311	0.0013	0.0	0.0013
Vetch in rainfed vineyard	60	0.075	49.8464	0.0015	0.0	0.0015
Vetch in irrigated fruit orchards (apple, peach, etc.)	70	0.088	96.9235	0.0009	0.0	0.0009
Vetch in rainfed arable land	100	0.125	73.0066	0.0017	1.0	0.0154
Vetch in irrigated arable land	100	0.125	193.847	0.0006	0.5	0.0032
* One hectare of common vetch for use as grain in organic management produce 1,000 kg ha-1. However, the factor of 0.8 was applied due to the stricter selection of grain required for its use as seed, as opposed to other uses (Guzmán et al., 2011).
** See Sheet Table S3

## Sheet: Table S2
Table S2. Manure land cost per N unit (ha kg-1 N)
	Yield			Portion consumed by livestock***			Metabolizable energy			Total Metabolizable Feed Energy	Metabolizable Energy	Sheep fed by one standard hectare	Manure by sheep*****	N in sheep manure*****	Land cost per N unit
	Barley		Vetch	Barley		Vetch	Barley		Vetch		Annual needs of a standard sheep****
Barley/vetch rotation, grown organically in a rainfed regime, without external fertilizer*	Grain	Straw**	Hay	Grain	Straw	Hay	Grain	Straw	Hay	MJ	MJ yr−1 sheep−1	nº	kg	%
	kg ha-1	kg ha-1	kg ha-1	%	%	%	MJ kg-1	MJ kg-1	MJ kg-1						ha kg -1 N
	1021	1225.2	1116	92.5%	0.5	92.5%	11.44	5.02	8.58	22.737	3464	6.6	750	0.83	0.0245
*Standard hectare, based in long term trials conducted in dryland of the Iberian Peninsula with a rainfall average of 480 mm. The fertilization only involved the N provided by the common vetch (Moreno et al., 2011)
**straw/grain ratio of 1.2 (Guzmán and González de Molina, 2017)
***Grain and hay losses in the post-harvest process: 7.5% (calculated from Gustavsson et al., 2011). Only 50% of the straw is consumed by livestock. The other 50% is buried.
**** To calculate the land needed to maintain the sheep, were taken into account the annual needs of a standard sheep (45 kg live weight with 1.5 lambings a year) as the benchmark animal
***** Urbano Terrón (1992)

## Sheet: Table S3
Table S3. N in useful manure from livestock fed with spanish resources in 2008 (t)
FEED PRODUCTION IN 2008 (t)
Grain (cereals and pulses, excluding barley)	3,926,142
Straw (cereals and pulses)	8,479,607
Green fodder	28,315,029
Agro-industry byproducts	2,315,290
METABOLIZABLE ENERGY AVAILABLE (GJ)
Agro-industry byproducts and grain (for monogastric livestock)	70,994,447
Straw and green fodder (for ruminant livestock)	103,204,960
HEADS OF CATTLE THAT CAN FEED (breeding females)
Pigs	2,717,170
Poultry	72,039,013
Sheeps	29,793,580
PRODUCTION OF USEFUL MANURE
Pigs (m3)	13,857,568
Poultry (t)	2,170,821
Sheeps (t)	22,345,185
N IN USEFUL MANURE (t)	260.956
Sources: Feed production (MAGRAMA, 2009; FAO, 2015).

## Sheet: Table S4
Table S4. N fixed by legume green manure (kg ha-1)
Green manure	Aboveground phytomass	Dry matter	Aboveground phytomass	Root:shoot index**	Root biomass	N	Symbiotically fixed N respect to total N at green manure incorporation timing***	Nitrogen rhizodeposition***	Symbiotically fixed N
	kg f.m. ha-1	%	kg d.m. ha-1		kg f.m. ha-1	%, on dry matter basis	%	% of total symbiotically fixed N	kg ha-1
Vetch in rainfed fruit orchards (olive, almond, etc.)	2500	0.376	940	0.4	376	3.4%	0.6	0.18	69.2311
Vetch in rainfed vineyard	1800	0.376	676.8	0.4	270.72	3.4%	0.6	0.18	49.8464
Vetch in irrigated fruit orchards (apple, peach, etc.)	3500	0.376	1316	0.4	526.4	3.4%	0.6	0.18	96.9235
Vetch in rainfed arable land*	2232	0.897	2002.1	0.4	800.842	3.4%	0.6	0.18	73.0066
Vetch in irrigated arable land	7000	0.376	2632	0.4	1052.8	3.4%	0.6	0.18	193.847
*Production and dry matter of hay vetch
** Guzmán and González de molina (2017)
***García Ruiz et al. (2012)

## Sheet: Table S5
Table S5, N provided by agroindustrial waste (t)
Agroindustrial waste*	Processed fruit**	Residue produced	Dry matter	N	Nitrogen losses***	N
	t	t	%	%, on dry matter basis	%	t
Olive oil mill wastes (alperujo)	5,831,732	3,722,508	36	1.40	33.3	12.514
Olive leaf accumulated in oil mill		291.587	39	1.43	33.3	1.097
Grape marc	5,759,955	1,151,991	40	2.03	33.3	6.239
Wine lees		495.356	6	3.52	33.3	697.81
Grape stalk		414.717	49	1.24	33.3	1.681
					Total	22.228
*Specifically they are the residues of the elaboration of the oil and the wine, Residues from the production of juices (orange, apple, etc) and shells (endocarp) of nuts have not been considered because of their low N content,
**processed fruit in average of five year, centred in 2008 (Ministerio de Agricultura, Alimentación y Medio Ambiente (MAGRAMA) http://www,magrama,gob,es/es/estadistica/temas/publicaciones/anuario-de-estadistica),
***Losses considered as a result of handling this waste (Guzmán and González de Molina, 2017)
